# Supplementary material for: Long-term intake of Lactobacillus paracasei KW3110 prevents age-related chronic inflammation and retinal cell loss in physiologically aged mice
Source: publisher site journal article supplement (doi:10.18632/aging.101583), 2018-10-19
Supplement: Supplementary file [file aging-v10i10-101583-supplementary-material-SD1.pdf]

SUPPLEMENTARY FIGURES

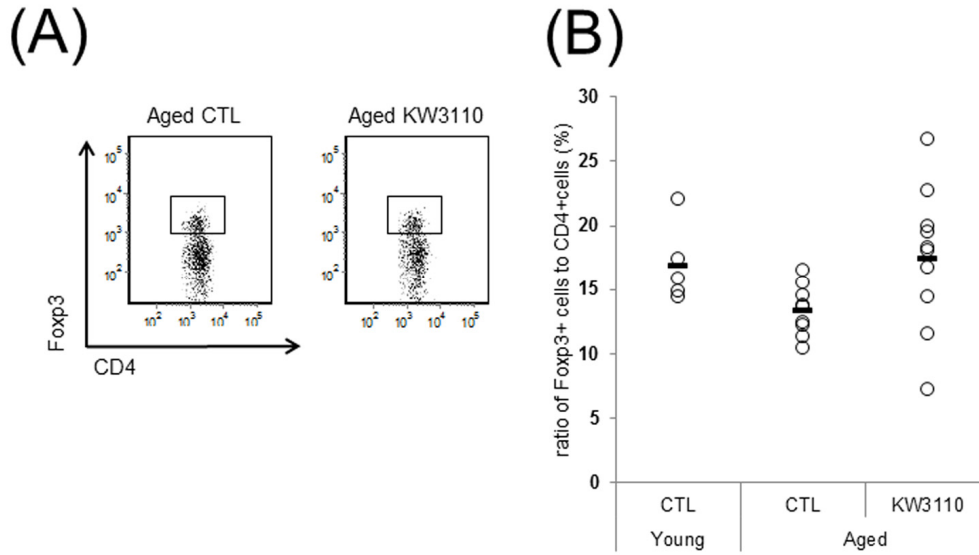

**Supplementary Figure 1. Intake of *Lactobacillus paracasei* KW3110 did not affect the regulatory T cells (Tregs) population in the lamina propria of the small intestine (SI-LP).** (A and B) To detect Tregs, SI-LP cells from young mice (3-months-old) and aged mice (17-months-old) were cultured and analyzed by flow cytometry. (A) Representative data of CD3 $\epsilon$ <sup>-</sup>, CD4<sup>-</sup>, and Foxp3-positive cells from aged mice fed a diet with or without *L. paracasei* KW3110. (B) The ratio of CD3 $\epsilon$ <sup>-</sup>, CD4<sup>-</sup>, and Foxp3-positive to CD3 $\epsilon$ <sup>-</sup> and CD4<sup>-</sup> cells. Statistical differences between three groups (young mice group fed a control diet, aged mice group fed a control diet, and aged mice group fed a diet containing KW3110) were analyzed by one-way analysis of variance (ANOVA), followed by the Tukey-Kramer test with significance set at  $p < 0.05$ . CTL = control diet; KW3110 = *Lactobacillus paracasei* KW3110 diet.

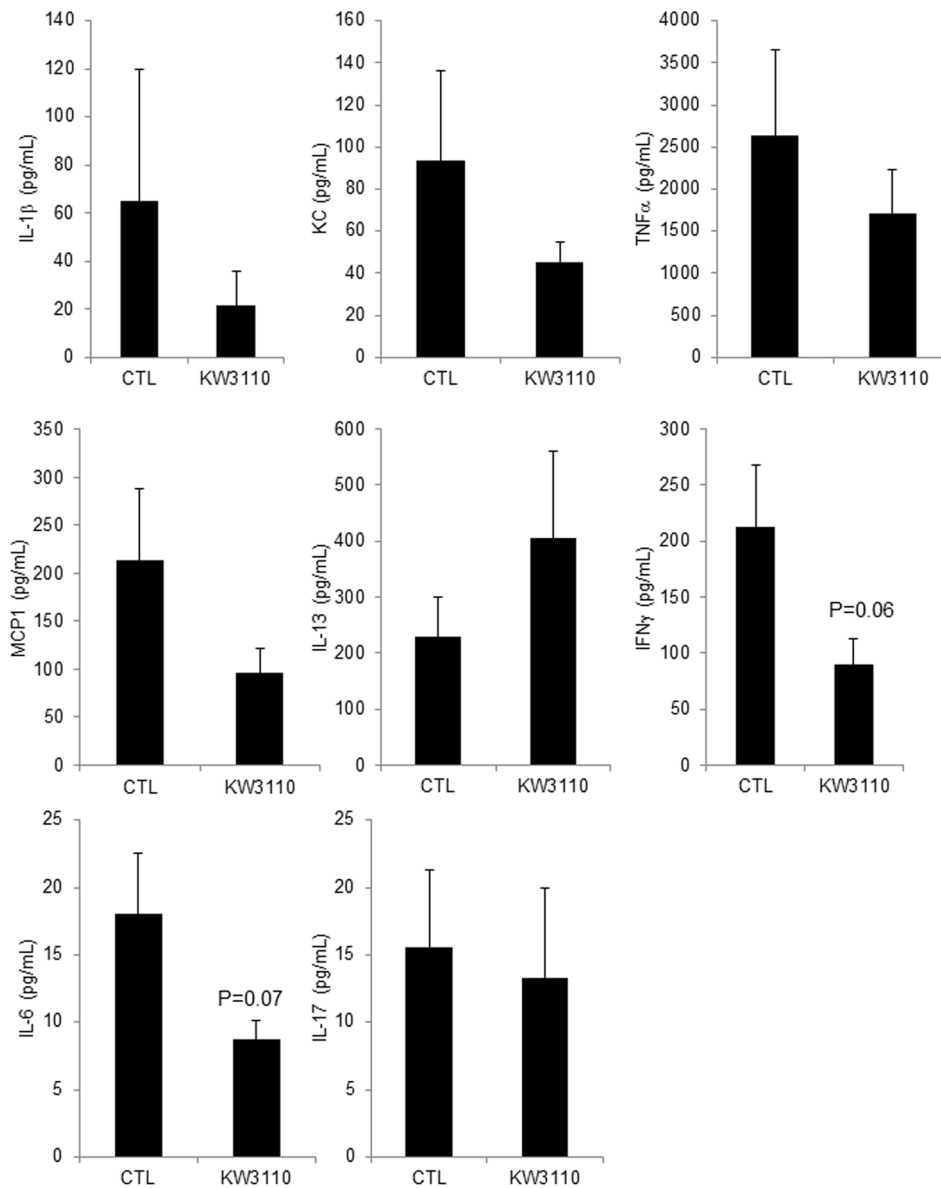

**Supplementary Figure 2. The levels of cytokines in the serum of aged mice fed a diet either with or without *Lactobacillus paracasei* KW3110 for 2 months.** Serum was collected and subjected to multiplex analyses to determine levels of cytokines (IL-1 $\beta$ , IL-6, IL-13, IL-17, IFN- $\gamma$ , TNF- $\alpha$ , KC, and MCP1) in aged mice (18-months-old) fed a diet with (KW3110) or without (CTL) *L. paracasei* KW3110 for 2 months. Values are presented as the means  $\pm$  SEM. Statistical differences between two groups (aged mice group fed a control diet versus aged mice group fed a diet containing KW3110) were determined using an unpaired, two-tailed Student's *t*-test with significance set at  $p < 0.05$ . IL = interleukin; IFN = interferon; TNF = tumor necrosis factor; KC = keratinocyte chemoattractant; MCP1 = monocyte chemoattractant protein 1.

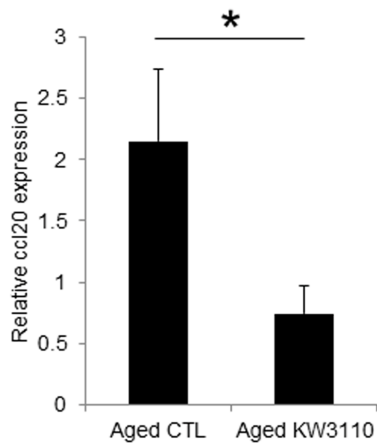

**Supplementary Figure 3. Suppression of chemokine expression in the lamina propria of the small intestine (SI-LP) by intake of *Lactobacillus paracasei* KW3110.** Total mRNA was extracted from SI-LP cells from aged mice (17-months-old) fed a diet with (KW3110) or without (CTL) *L. paracasei* KW3110 for 6 months. *Ccl20* gene expression was estimated by qRT-PCR and normalized to *Gapdh* gene expression. Values are presented as the means ± SEM. Significance was assumed if the p value was < 0.05. \* p < 0.05.

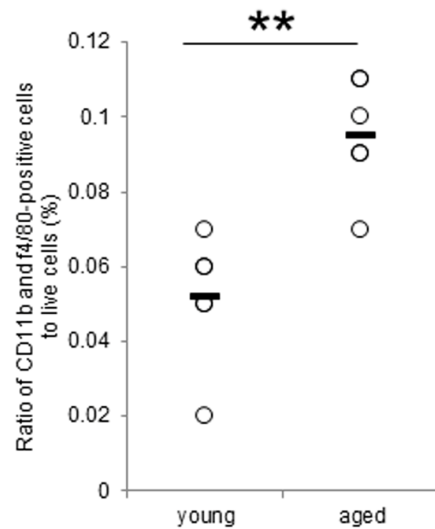

**Supplementary Figure 4. The retinal macrophages increased in aged mice as compared with young mice.** The ratio of CD11b and f4/80-positive to live cells. Significance was assumed if the p value was < 0.05; \*p<0.05.
